# Supplementary material for: Accuracy of circulating adiponectin for predicting gestational diabetes: a systematic review and meta-analysis
Source: Springer Nature journal article supplement (doi:10.1007/s00125-015-3855-6), 2016-01-14

**ESM Fig 1:** Quality assessment of the selected studies based on the QUADAS-2 tool.

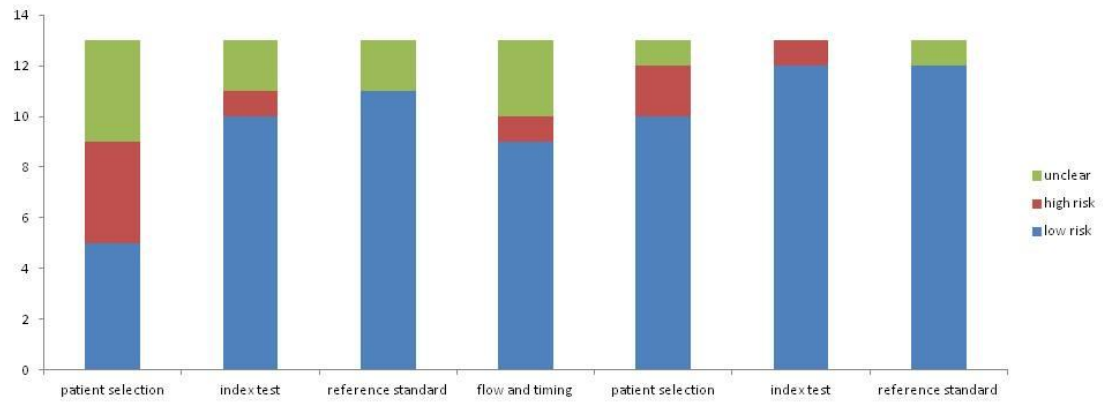

Supplement: MOESM2 [file 8093526]
