# Supplementary material for: Accuracy of circulating adiponectin for predicting gestational diabetes: a systematic review and meta-analysis
Source: Springer Nature journal article supplement (doi:10.1007/s00125-015-3855-6), 2016-01-14

ESM Fig 2: Funnel plot of the studies included in the meta-analysis. Diagnostic Odd Ratio (DOR)

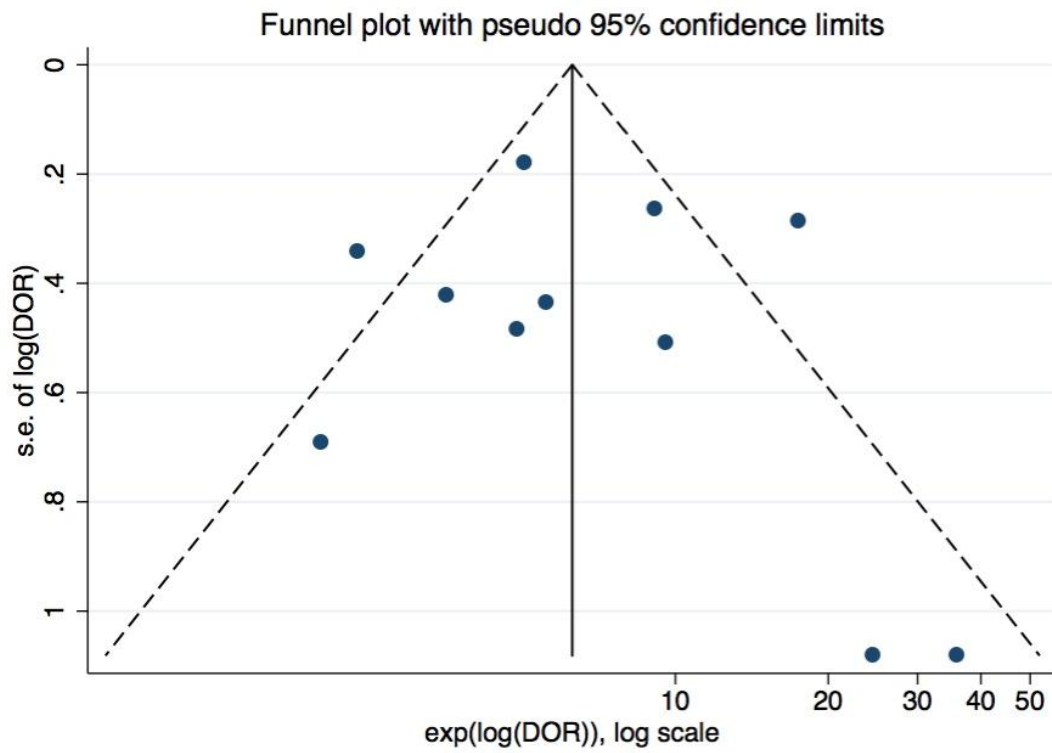

Supplement: MOESM3 [file 8093526]
