# Supplementary material for: Accuracy of circulating adiponectin for predicting gestational diabetes: a systematic review and meta-analysis
Source: Springer Nature journal article supplement (doi:10.1007/s00125-015-3855-6), 2016-01-14
Supplement: MOESM5 [file 8093526]

ESM Table 2: Negative Predictive Values (NPV) and Positive Predictive Values (PPV) for different prevalence points of Gestational Diabetes (GDM).

| Prevalence (%) | NPV (%)* | PPV (%)* |
|----------------|----------|----------|
| 5              | 97.7     | 13.3     |
| 10             | 95.2     | 24.5     |
| 15             | 92.6     | 34.0     |
| 20             | 89.8     | 42.1     |

\* Estimated sensitivity of 64.7 % and specificity of 77.8 % from meta-analysis.

$$\text{NPV} = \frac{\text{specificity} \times (1 - \text{prevalence})}{[(1 - \text{sensitivity}) \times \text{prevalence} + \text{specificity} \times (1 - \text{prevalence})]}$$

$$\text{PPV} = \frac{\text{sensitivity} \times \text{prevalence}}{[\text{sensitivity} \times \text{prevalence} + (1 - \text{sensitivity}) \times (1 - \text{prevalence})]}$$
